# Supplementary material for: Facile synthesis of thermal-responsive P(NIPAM-S)/SiO2 hybrid hollow spheres and their controllable release properties for fragrance
Source: Royal Society of Chemistry journal article supplement (doi:10.1039/c3py00186e), 2013-01-01
Supplement: c3py00186e.pdf [file c3py00186e.pdf]

## Supporting Information

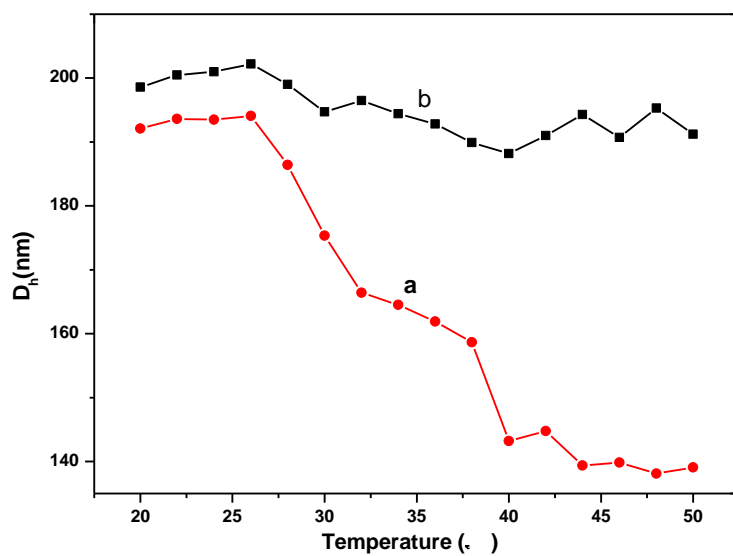

**Figure S1.** The change of Hydrodynamic diameter of the pure P(NIPAM-S) colloids as a function of temperature in different media. (a) ethanol and (b) water
